# Supplementary material
Source: PubMed Central journal article supplement (PMC4944793)
Supplement: mmc9.pdf [file mmc9.pdf]

# Physical Mechanisms of Cancer in the Transition to Metastasis

Pilhwa Lee<sup>1</sup> and Charles W. Wolgemuth<sup>2,\*</sup>

<sup>1</sup>Molecular and Integrative Physiology, University of Michigan, Ann Arbor, Michigan; and <sup>2</sup>Department of Physics and MCB, University of Arizona, Tucson, Arizona

**ABSTRACT** Whether a tumor is metastatic is one of the most significant factors that influence the prognosis for a cancer patient. The transition from a nonmetastatic tumor to a metastatic one is accompanied by a number of genetic and proteomic changes within the tumor cells. These protein-level changes conspire to produce behavioral changes in the cells: cells that had been relatively stationary begin to move, often as a group. In this study we ask the question of what cell-level biophysical changes are sufficient to initiate evasion away from an otherwise static tumor. We use a mathematical model developed to describe the biophysics of epithelial tissue to explore this problem. The model is first validated against in vitro wound healing experiments with cancer cell lines. Then we simulate the behavior of a group of mutated cells within a sea of healthy tissue. We find that moderate increases in adhesion between the cell and extracellular matrix (ECM) accompanied by a decrease in cell-cell adhesion and/or Rho family of small GTPase activation can cause a group of cells to break free from a tumor and spontaneously migrate. This result may explain why some metastatic cells have been observed to upregulate integrin, downregulate cadherin, and activate Rho family signaling.

## INTRODUCTION

The prototypical progression of cancer involves sequential genetic mutations that alter cell cycle control and many other cellular functions (1). In this paradigmatic picture, the primary tumor begins as a small, noninvasive growth where dysregulation of cell replication and death leads to expansion of the tumor mass. As the tumor continues to grow, further genetic mutations cause some cells to become more invasive, possibly because of altered cell-cell and cell-ECM interactions (2–4). Eventually, certain cells metastasize, breaking free from the primary tumor and migrating to distal parts of the body. Some of these cells may settle in a new location in the body and form a secondary tumor. Approximately 90% of cancer fatalities are attributable to these secondary tumors that result from metastasis (5,6).

Metastasis is usually the main factor in determining a patient's prognosis (1), and many cancer drugs are developed to inhibit metastatic invasion of tumors (7). However, metastasis does not evolve through a specific program of mutations, as is suggested by the prototypical progression. A major stumbling block in cancer treatment is that genotypic and proteomic variation in metastatic cells is largely

heterogeneous (8,9), which suggests that metastatic potential is not dictated by specific mutations but, rather, can be achieved in a large number of different ways. The resulting metastatic cells, though, have similar behavior at the functional level: they migrate away from the site of the primary tumor, moving through tissues and into and out of the bloodstream. Because metastasis is an inherently physical process, we propose that the heterogeneous genetic and molecular-level changes that occur during the transition to metastasis conspire to produce specific biophysical changes inside the cell that define metastatic potential. Indeed, the biomechanics and biophysics of cells are known to be altered in cancer (10), including changes in cell stiffness, adhesion, and traction forces (11–13), and two distinct processes that have been implicated in the transition to metastasis, epithelial-to-mesenchymal transitions (EMT) or mutations in suppressor genes (MSGs), such as p53, both lead to alterations in cell-cell adhesion and activation of Rho GTPases (14–16). We, therefore, pose the question of what cell-level biophysical alterations can produce metastasis.

In this study we begin to address this question using mathematical modeling and examine the early stages of the transition to metastasis: the initial evasion away from the primary tumor. Most cancers originate in epithelial tissues (1). Our group recently developed a model that

---

Submitted November 10, 2015, and accepted for publication May 31, 2016.

\*Correspondence: [wolg@email.arizona.edu](mailto:wolg@email.arizona.edu)

Editor: Fazoil Ataullakhanov

<http://dx.doi.org/10.1016/j.bpj.2016.05.046>

© 2016 Biophysical Society.

accurately describes the physics and motion of cells within epithelial layers during wound healing assays (17,18). This model considers four major factors of epithelial biophysics: cell polarity, actomyosin contractility, cell-cell adhesion, and cell-ECM adhesion (Fig. 1). It is possible that any or all of these processes are modified during metastatic transition. To show that our model is relevant for cancer metastasis, we begin our investigation by first validating the model against results from a number of wound healing experiments reported in the literature that probed how alterations in cell-cell adhesion and actomyosin contractility affect cancer cell migration rates. We then develop the model within the context of a simplified picture of a tumor and show that localized modifications of cellular biophysics can drive spontaneous migration of cell clusters. The biophysical alterations that we identify to be necessary for evasion away from the initial tumor are consistent with these previous reports on the effect of specific proteins on metastatic potential and provide new insight, to our knowledge, into what factors influence metastasis.

## MATERIALS AND METHODS

### Mathematical model

A complete description of the mathematical model and the method that we used to solve the equations is given in the [Supporting Material](#). Here, we give a brief description of the equations and the numerical method.

#### Force balance in the monolayer

Epithelia can be treated as a continuous sheet of cells that is in contact with a rigid surface (such as a basement membrane) (17). Because the resistance from the environment is much larger than inertia, the sum of the forces is equal to zero. We assume that there are four forces that act within the cell layer: 1) individual cells produce a local propulsive force of magnitude  $f_p$  that is directed along the cell polarization  $\mathbf{d}$ ; 2) movement of the cells across the surface (e.g., basement membrane) is resisted by a drag force proportional to the local velocity  $\mathbf{v}$ , with drag coefficient  $\zeta$ ; 3) intracellular processes produce a contractile stress that is aligned along the direction of the cell polarization, with the stress given by  $f_d \mathbf{d} \mathbf{d}$ ; and 4) cell-cell adhesion

leads to an additional stress  $\sigma_m$  that acts between the cells. The force balance equation is then as follows (see the [Supporting Material](#)):

$$\nabla \cdot \sigma_m = \zeta \mathbf{v} + \nabla \cdot (f_d \mathbf{d} \mathbf{d}) - f_p \mathbf{d}. \quad (1)$$

#### Dynamics of cell density

The cell density  $c$  is governed by the continuity equation:

$$\frac{\partial c}{\partial t} + \nabla \cdot (\mathbf{v}c) = D \nabla^2 c, \quad (2)$$

where the cells migrate with a local velocity  $\mathbf{v}$  and we allow for diffusion with coefficient  $D$ .

#### Dynamics of the polarization direction

Motile cells are polarized: they move in a specific direction. The cell polarization is represented by the vector  $\mathbf{d}$ . This polarization field moves and rotates because of the motion of the cells. Because the cells adhere to the substrate, there is resistance to the rotation of the cells, which is proportional to the rotational rate, with a rotational drag coefficient  $\zeta_r$ . This drag coefficient is related to the cell-substrate drag coefficient  $\zeta_r = \zeta L^2 / 12$ , where  $L$  is the diameter of the cell. In addition, we assume that there is a tendency for nearby cells to align with one another, the strength of which is governed by a Frank constant  $K$ . This tendency to align can be attributed to two factors. First, individual cells have a uniform polarization. Therefore, in our continuum description the polarization vector should not change on length scales smaller than the size of the cell. Second, steric interactions between cells and/or cell signaling could act to orient neighboring cells, which would increase the distance over which there is a tendency for the cells to remain aligned. The Frank constant divided by the rotational drag coefficient acts like a diffusion coefficient and has units of velocity times length. We can then estimate the value of  $K/\zeta_r$  using the average velocity of a cell ( $\sim 10 \mu\text{m/h}$ ) times the length scale over which the polarization should be roughly constant ( $\sim 10 \mu\text{m}$ ). Therefore,  $K/\zeta_r \sim 100 \mu\text{m}^2$ . Under these assumptions, the overall dynamics of the cell polarization obeys a similar equation to the dynamics of the director field in nematic liquid crystals (14):

$$\zeta_r \left( \frac{\partial \mathbf{d}}{\partial t} + \mathbf{v} \cdot \nabla \mathbf{d} - \frac{1}{2} (\nabla \times \mathbf{v}) \times \mathbf{d} \right) = K \nabla^2 \mathbf{d}. \quad (3)$$

This equation represents the balance between the orientational drag on the left-hand side, and the elastic torque from polarized cells at the right-hand side.

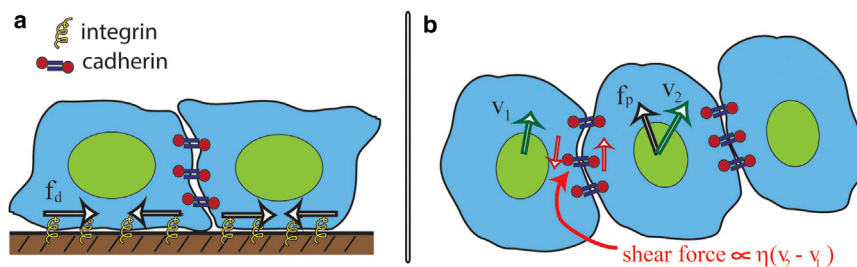

FIGURE 1 Schematic of the principal features of our model for collective cellular migration. Our model considers four principle forces: a propulsive force due to the interaction between actin and the substrate via integrin molecules; resistance to the motion of the cell from the substrate, also mediated by integrin; a dipole-distributed stress produced by intracellular contraction; and cell-cell adhesion forces. (a) A lateral view is shown of two cells on a substrate highlights adhesion to the substrate through integrin molecules, and how

cytoskeletal flows inside the cell transmit the dipole distributed stress to the substrate denoted by  $f_d$ . The cells are attached to each other through cadherin bonds. (b) A top-down view is shown of three cells in contact highlights the propulsive force  $f_p$  that is exerted onto the substrate (black arrow). This force depends on integrin and the intracellular actin flow and is assumed to be directed along the polarization direction of the cell. Differences in the velocities between neighboring cells cause shear forces on the cadherin molecules, which leads to an effective viscous shear stress in the tissue.  $v_1$  and  $v_2$  (green arrows) denote the velocities of the left and center cells, respectively. The magnitude of the shear stress is proportional to an effective viscosity, which is denoted by  $\eta$ , and the difference in velocity between the cells. Our model averages these forces over a small region of cells to produce a continuum description for the epithelial layer (see [Supporting Material](#)). To see this figure in color, go online.

### The cell-cell adhesion stress

We have previously shown (17) that because cell-cell adhesion is primarily mediated by cadherin bonds that have turnover times on the scale of 15 min to 1 h (19), that the cell-cell interaction stress can be modeled as a Maxwell fluid. We therefore use this description to define the dynamic equation for  $\sigma_m$  (see the [Supporting Material](#)):

$$\begin{aligned} \tau \frac{\partial \sigma_m}{\partial t} + \sigma_m = & \eta (\nabla \mathbf{v} + (\nabla \mathbf{v})^T) + (\lambda - \eta) (\nabla \cdot \mathbf{v}) \mathbf{I} \\ & - \sigma_0 (c - c_0) \mathbf{I} \\ & - \beta \left( \frac{V_{\text{tumor}}^0 - V_{\text{tumor}}}{V_{\text{tumor}}^0} \right) \mathbf{I}_{\text{tumor}}. \end{aligned} \quad (4)$$

In this model,  $\tau$  is the cadherin turnover timescale, and  $\eta$  is a cell-cell viscosity that depends on the average number of bound cadherin molecules and the strength of the cadherin bond. In addition, there is resistance to compression or extension that is defined by two parameters. First, because cells in monolayers extend lamellipodia under other cells (20), we assume that there are viscous forces that resist compression or extension with a strength proportional to the volumetric viscosity  $\lambda$ . Second, because the cells themselves are elastic, there is an effective pressure that tries to preserve cell density that is proportional to the bulk modulus  $\sigma_0$ . The identity matrix is defined as  $\mathbf{I}$ . For our monolayer tumor model, we also add in an additional pressure to preserve the area of mutated region. The strength of this term is given by  $\beta$  and this term is only used within the tumor region.

### Numerical methods

The two-dimensional (2D) free boundary problem was solved using the moving boundary node method (19). This method is a level set-based, finite volume algorithm. For these simulations, we used a time step of 0.001 h and a grid spacing that was 1/40 of the initial width of the domain (i.e., for a monolayer with an initial width of 250  $\mu\text{m}$ , the grid spacing was 7.5  $\mu\text{m}$ ). Because of the initial random orientations in the cellular migration, we collect 20 simulations for averaging the migration velocity. For more information on our numerical discretization see the [Supporting Material](#).

## RESULTS

When a single epithelial cell is plated onto a substrate, it crawls, moving along a given direction over tens of minutes and randomly reorienting on longer timescales (21). Inside

the cell, the actin cytoskeleton flows rearward at the front of the cell and forward at the rear, driven by polymerization and actomyosin contraction (22). This cytoskeletal flow, through its interaction with adhesion proteins, such as integrin, exerts traction stresses on the substrate that are in the same direction as the flow (23). To a first approximation, then, the traction forces have a dipole distribution that is aligned with the cell motion. In addition, when the same cell is in contact with other cells, it adheres to the neighboring cells via cadherin molecules (24,25), and cell movements can compress or stretch the cells. Therefore, we can break the forces that act on a cell in a monolayer into four primary components: a propulsive force that pushes the cell along the surface  $f_p$ , a resistive force from the substrate that is proportional to the velocity with drag coefficient  $\zeta$ , a dipole-distributed stress from the cytoskeletal flow  $f_d$ , and forces due to cell-cell adhesion (Fig. 1). In addition, there is an isotropic pressure due to cell elasticity that maintains the cell density. We have previously shown that forces due to cell-cell adhesion produce a viscoelastic stress within the epithelial layer that depends on the cadherin turnover time  $\tau$  and an effective viscosity  $\eta$  (17) (Fig. 1). Because resistive forces are large compared with the cells' inertia, the sum of the forces on any cell is zero. Therefore, averaging over the forces on a cell leads to a continuum-level force balance equation that defines the velocity field within the epithelium. This model has been previously shown to reproduce the complex dynamics that are observed during Madin-Darby canine kidney (MDCK) wound healing experiments (the detailed mathematical model is given in the [Supporting Material](#), and the model parameters are shown in Table 1) (17,18,26,27). The force balance description that we use contains many of the same features that have been used in discrete cell models for collective migration (28–30); however, our model also includes intracellular contraction, which is often ignored in these models, with one notable exception that included membrane contraction (30). Although our model was developed to describe wound healing experiments, the biophysical features of cell motility and cell-cell interactions that are included in the

**TABLE 1 Model Parameters**

| Parameter                   | Symbol            | Value                                              | Source                 |
|-----------------------------|-------------------|----------------------------------------------------|------------------------|
| Viscoelastic timescale      | $\tau$            | 0.25 h                                             | E.E (25), C2 cells     |
| Effective shear viscosity   | $\eta$            | 10 dynes $\times$ h/cm                             | E.S.                   |
| Volumetric viscosity        | $\lambda$         | $10^3$ dynes $\times$ h/cm                         | E.S.                   |
| Substrate drag coefficient  | $\zeta$           | $2.5 \times 10^4$ dynes $\times$ h/cm <sup>3</sup> | E.E (23,55), MDCK, MEF |
| Average cell crawling speed | $V_0$             | 10 $\mu\text{m}/\text{h}$                          | (55), MEF              |
| Propulsive force            | $f_p = \zeta V_0$ | 25 dynes/cm <sup>2</sup>                           | E.E (23,55), MDCK      |
| Traction stress             | $f_d$             | $\sim 10^3$ dynes/cm                               | (23), MDCK             |
| Dipole length               | $b$               | 10 $\mu\text{m}$                                   | E.E (23), MDCK         |
| Rotational drag coefficient | $\zeta_r$         | 400 dynes $\times$ h/cm <sup>2</sup>               | E.E (56), 3T3          |
| Frank constant              | $K$               | $2 \times 10^{-4}$ dynes                           | E.E (26), MDCK         |

E.S. (estimated from simulations) is the value determined by matching simulation results to existing experimental data; E.E. (estimated from experiments). The following cell types were used to determine these parameters: Madin-Darby canine kidney (MDCK), mouse embryonic fibroblasts (MEF), Swiss 3T3 fibroblasts (3T3), and Mouse C2 cells (C2).

model are broadly applicable to epithelial, cancer, and many other motile cell types and are not specific to only wound healing scenarios. Therefore, it is reasonable to assume that the same model may also be informative about cancer cell migration and the transition to metastasis.

### Validation of the model for cancer cells

Because our collective migration model has only been validated against MDCK experiments, it is important to first determine that it can reproduce behaviors in cancer-relevant cell types before embarking on modeling metastasis. In addition, it is also important to test that the model provides realistic predictions when the migrating cells are biophysically perturbed in a way that alters the model parameters. To this end, we chose to compare our simulations from data from two representative wound healing experiments.

### Effects of cell-cell adhesion on the rate of wound healing

The first experiment examined the role of cadherin (cell-cell adhesion) on MCF10A migration, a breast-derived epithelial cell line that is often used in cancer biology studies (31). This experiment examined the effects of transforming growth factor  $\beta 1$  (TGF- $\beta 1$ ) on EMT, a key transition in metastatic transformation (32). In EMT, E-cadherin is downregulated, whereas N-cadherin is upregulated. In this work, it was shown that N-cadherin knockdown leads to E-cadherin upregulation and vice versa. When N-cadherin was knocked down in these cells, the rate that in vitro wounds healed increased by approximately a factor of 2, but only in the presence of TGF- $\beta 1$ . However, overexpression of N-cadherin (E-cadherin knockdown) increased wound healing rates by a factor of 1.2 in the absence of TGF- $\beta 1$  (31).

To explore the role of cadherin in wound healing with our model, we used a baseline set of parameters (Table 1) to define the forces and viscosity of MCF10A cells before exposure to TGF- $\beta 1$ . We simulated a strip of cells that is 250  $\mu\text{m}$  wide and 1000  $\mu\text{m}$  long that is bounded by a denuded region on either side of the strip (Fig. 2 a). Boundaries along the width of the cell strip were treated as free boundaries, and periodic boundaries were used along the length. We computed the average velocity of the wound as the cells migrated out into the denuded region. Random initial conditions were used and we ran 10 simulations per condition to determine the average and standard error for the velocity. For the baseline parameters, we found an average border velocity of  $2.3 \pm 0.1 \mu\text{m/h}$ , which is slightly slower than what is measured for MDCK wound healing assays (27). Because E-cadherin is the key mediator of cell-cell adhesion (3), we assumed that the cell-cell interaction viscosity depends on E-cadherin levels in a concentration-dependent manner. E-cadherin adhesions involve the dimerization of molecules between cells. Therefore, we expect

that the viscosity should scale like the square of the cadherin concentration. To simulate the N-cadherin overexpression experiments, we therefore decreased this viscosity by a factor of 100 to simulate knockdown of E-cadherin by  $\sim 10$ -fold. We found that decreased cell-cell viscosity produced a roughly 1.1-fold increase in the wound healing rate, which was in agreement with the increase in the time rate of change of the area measure in the experiments (Fig. 2 b) (31). We then simulated TGF- $\beta 1$  stimulation using an 8-fold increase in the propulsive force  $f_p$  and traction stress  $f_d$  in the model. This increase leads to an 8-fold change in border advance velocity from the baseline parameters, which matches the increase seen experimentally with TGF- $\beta 1$  stimulation (31). To simulate N-cadherin knockdown, we increased the cell-cell viscosity by a factor of 100 and found a decrease in border advance of  $\sim 1.6$ , which compares with the factor of 2 measured experimentally (Fig. 2 c) (31).

### Effects of actomyosin contraction on the rate of wound healing

The literature on the role of actomyosin contraction in wound healing is somewhat contradictory. Experiments done with mouse hepatic stellate cells suggests that wound healing assays close faster when myosin-II is inhibited by blebbistatin at doses up to 50  $\mu\text{M}$  (33). Conversely, wound healing assays with MCF10A cells on hard substrates (65 kPa) are slowed by 25  $\mu\text{M}$  blebbistatin treatment, but no significant effect is noticed on soft substrates (3kPa) (34). Similarly, the rate of wound healing in mouse epithelial kidney cells is not affected by blebbistatin treatment (35).

Although the reported effects of blebbistatin seem contradictory, it is important to note that there is marked difference in how fast the wound border edge progresses for each of these cell types. The hepatic cells are the slowest, with an average border advance on order of 15  $\mu\text{m/h}$  (33). The mouse kidney cells and the MCF10As on soft substrates progressed at  $\sim 20$ –25  $\mu\text{m/h}$ , and the MCF10As on hard substrates moved at  $\sim 42 \mu\text{m/h}$  (34,35). Blebbistatin treatment is expected to reduce the contractile stress that cells exert on the substrate. In addition, we hypothesize that the rate of border advance correlates with the propulsive force from the cells, which is consistent with experimental observations of the role of profilin in wound healing (36). Therefore, we used our model to examine how the contractile dipole-distributed stress affects wound healing rates for parameters that give comparable velocities with what is observed in these experiments. To reproduce the velocity of MCF10As on stiff substrates, we set a propulsive force of  $f_p = 1600 \text{ dynes/cm}^2$  and a dipole stress of  $f_d = 500 \text{ dynes/cm}$ . A 25  $\mu\text{M}$  blebbistatin treatment was mimicked by reducing the dipole stress to  $f_d = 6.25 \text{ dynes/cm}$ . These simulations gave a velocity of  $32 \pm 2.7 \mu\text{m/h}$  for the untreated cells, and blebbistatin treatment resulted in a decreased border

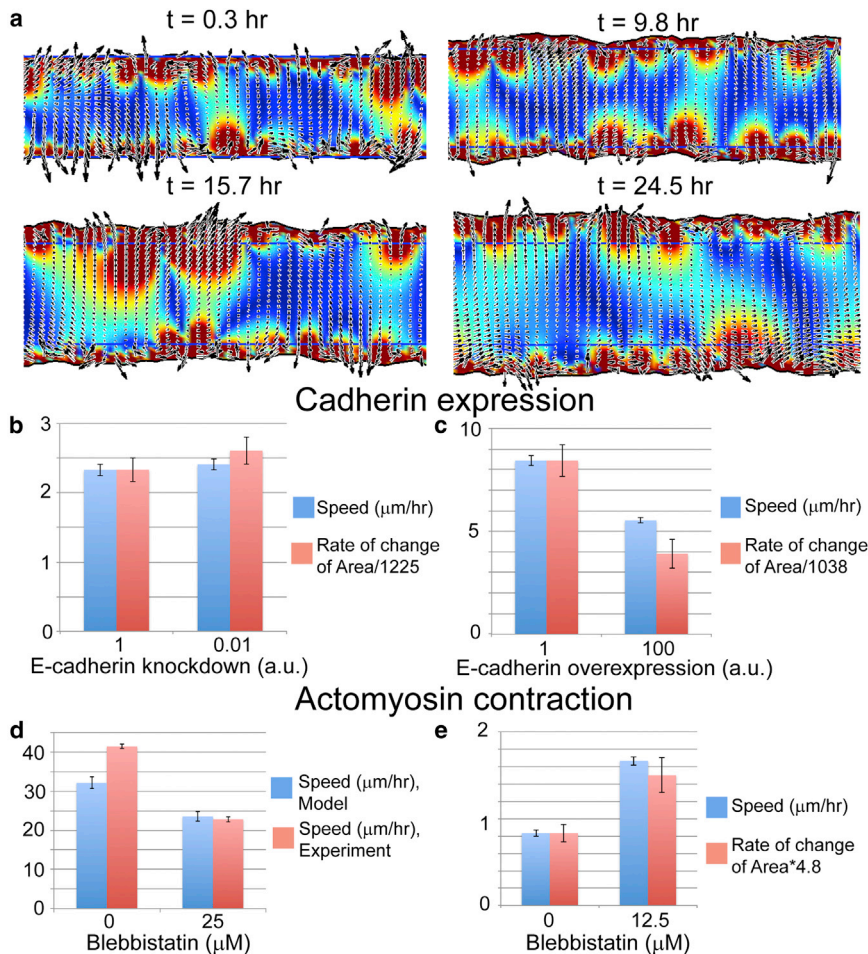

**FIGURE 2** (a) We validated our model by comparing simulations with previous wound healing experiments that perturbed cell-cell adhesion and actomyosin contraction in cancer-relevant cell lines. The wound healing simulations compute the velocity field in a strip of epithelial cells. We track the spreading of a strip of cells and measure the average rate of the border advance. Overexpression of N-cadherin leads to decreased levels of E-cadherin and was shown to produce a small increase in the time rate of change of the area of a wounded layer of MCF10A cells (b, red bars), whereas knockdown of N-cadherin reduced E-cadherin levels and slowed the progression of the area (c, red bars) (data for the time rate of change of the area  $dA/dt$  taken from (33) and scaled to compare with simulation velocities). Our model also shows that decreasing the cell-cell adhesion (the cell-cell viscosity  $\eta$ ) produces a modest increase in the advance of the border (b, blue bars), whereas increasing cell-cell adhesion slows border advance in our simulations (c, blue bars). (d and e) Blebbistatin treatment differentially affects different cell types. MCF10A cells on rigid substrate migrate rapidly and are slowed down when blebbistatin is used to inhibit actomyosin contraction (34) (d, red bars). Consistent with this finding, our model produces a decrease in speed when we decrease the dipole stress for parameters that give fast migration (d, blue bars). On the other hand, border speed in slower cells, such as hepatic cells, is observed to increase upon blebbistatin treatment (33), which agrees with our model when we use parameters that reduce the overall border migration (e, red bars are data from (33); blue bars are simulation results). See text and Table 1 for parameters and details. To see this figure in color, go online.

speed of  $23 \pm 2.5 \mu\text{m/h}$  (Fig. 2 d). These results are in reasonable agreement with the MCF10A border speeds measured on stiff substrates (34). To simulate the slower hepatic cells, we used a propulsive force of  $f_p = 375 \text{ dynes/cm}^2$ , a dipole stress of  $f_d = 1500 \text{ dynes/cm}$ , and a substrate drag coefficient  $\zeta = 1.25 \times 10^4 \text{ dynes h/cm}^3$ . Blebbistatin treatment was simulated by reducing the dipole stress to  $f_d = 500 \text{ dynes/cm}$ . The untreated simulation gave a border velocity of  $0.82 \pm 0.05 \mu\text{m/h}$  and the blebbistatin simulations produced a larger velocity of  $1.66 \pm 0.07 \mu\text{m/h}$ , which was consistent with the observed increase in the number of cells in the wounded region after 24 h (Fig. 2 e) (33).

### Cellular biophysics in the initial evasion from the primary tumor

The preceding results suggest that our collective migration model can accurately simulate the collective movements of epithelial cells under alterations that influence force production and cell-cell adhesion. To test our hypothesis that these biophysical parameters are key determinants of early

metastasis, we consider a simplified picture of a tumor undergoing a metastatic transition. We treat the main tumor mass as being comprised of biophysically similar, nonmetastatic cells surrounding a group of mutated (i.e., biophysically altered), potentially malignant cells (Fig. 3 a). Because most cancers originate in epithelial tissues (1), our mathematical model that is based on the physics and motion of cells within epithelial layers is appropriate to explore what localized alterations in cellular biophysical parameters will cause the altered population of cells to spontaneously migrate. Because this is a continuum-level model for collective migration, our analysis is most applicable to cancers that involve collective motion during metastasis, such as melanoma, squamous cell carcinoma, large-cell lung cancer, epithelial prostate cancer, lobular breast cancers, and rhabdomyosarcoma (37).

We begin our analysis with a highly simplified model of a tumor. We consider a uniform population of cells located on a  $400 \times 400 \mu\text{m}$  periodic domain. We arbitrarily identify a  $100 \mu\text{m}$  diameter circular region within this population of cells (Fig. 3 b, blue circular region). This circular region is the “tumor” that will be biophysically altered to

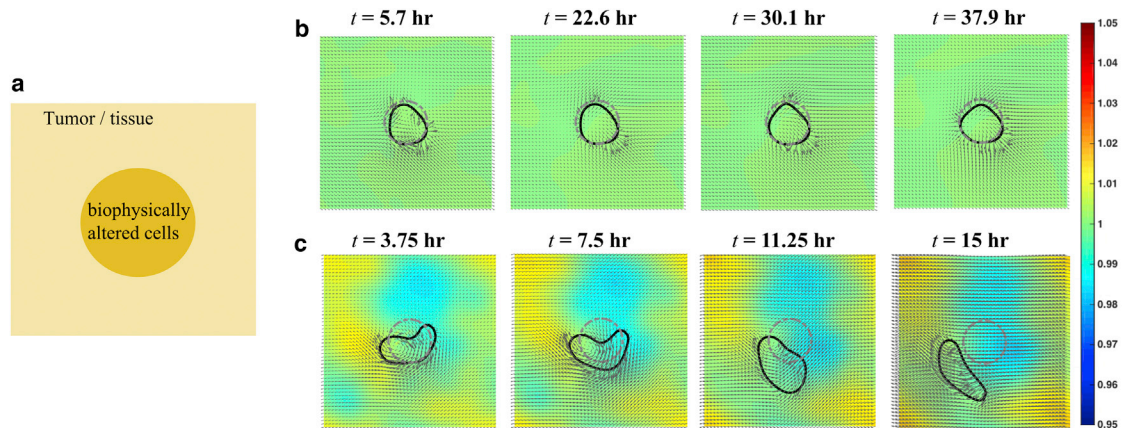

FIGURE 3 Mutations can lead to spontaneous migration in confluent cell layers. (a) Schematic of the initial condition of a simplified tumor model is shown. A tissue/tumor of epithelial cells (pale yellow) surrounds a  $100\ \mu\text{m}$  diameter region of biophysically altered cells. We examined what biophysical alterations are sufficient to lead to spontaneous migration of these mutated cells. (b) Results from a control simulation (Movie S1). The cells in the initially circular region (dotted gray contour) have the same biophysical parameters as the exterior tissue. The initially circular region deforms some over the course of the simulation, as shown by the black contour, but the center of mass remains within the initial circular region. (c) When the cell-ECM adhesion is increased by a factor of 5 and the cell-cell adhesion is decreased by a factor of 5 (which represents upregulation of integrin and downregulation of cadherin), the initially circular region of cells (dotted gray contour) deforms and begins to spontaneously migrate as a cluster after  $\sim 10$  h (Movie S2). The black contour shows time progression of the mutated cells. (b and c) The cellular velocity field  $\mathbf{v}$  within the entire tissue is depicted by the black arrows and the colormap shows the cell density, which varies from 0.95 (blue) to 1.05 (red) times the baseline density. To see this figure in color, go online.

determine whether these cells spontaneously migrate. We chose this simple picture because it is conceivable that in vitro experiments could be used to test the predictions from this scenario. The model is first simulated using uniform parameters (given in Table 1) within the entire domain. Over the course of the simulation, we track the location of the cells that started within the blue region. Forces within the epithelial layer produce velocities that cause the selected region of cells to deform some. However, over the course of a 50 h simulation, the center of mass of this region of cells does not migrate substantially away from where it started and always remains within the initial region (Fig. 3 b). Therefore, as expected, a cluster of nonmetastatic cells within a population of similar epithelial cells is predicted to remain fairly stationary.

Metastasis is often attributed to either EMT or MSG (14,32); however, it may also involve amoeboid locomotion or cell blebbing (38,39). A primary feature of EMT is upregulation of integrin (cell-ECM adhesion) and downregulation of cadherin (cell-cell adhesion), and this combination of upregulation of integrin and downregulation of cadherin has been identified in a number of cancer metastases (3). We, therefore, begin by exploring the effects of altering the cells in the circular region of our simulation by increasing cell-ECM adhesion (increasing the substrate drag coefficient  $\zeta$  by a factor of 5) while decreasing cell-cell adhesion (reducing the cell-cell viscosity  $\eta$  by a factor of 5). We chose a factor of 5 because this is approximately the change in expression levels for N-cadherin that were measured in (31), and it is also the factor that we found to match changes in cell speed in the study on integrin-ligand binding (40). In striking contrast with the previous uniform

simulation, we find that when cell-ECM adhesion is increased and cell-cell adhesion is decreased in a small region of cells, that this cluster of cells breaks free of its original location within  $\sim 10$  h and spontaneously migrates as a cluster of cells (Fig. 3 c). That is, our model predicts that upregulation of integrin along with downregulation of cadherin is sufficient to drive migration away from the initial tumor. In our simulations, this spontaneous migration of the cells is excited by the random initial condition that we choose for the polarization. Our previous work examined the linear stability of epithelial layers and found that there are parameter regimes for which the stationary epithelium is unstable (18). Therefore, if the biophysical parameters are in the correct regime, small random perturbations can lead to large-scale motions.

This result suggests that we can use our model to probe how the different biophysical parameters in our model independently affect evasion probability. We focus on the four parameters that are expected to be most relevant. As already mentioned, we expect cell-ECM and cell-cell adhesion to influence metastatic probability. In addition, Rho GTPases, which regulate cytoskeletal dynamics, are known to be involved in some cancers (15). For example, RhoC, which can activate formins and is upstream from myosin activation, has been identified as being involved in transitioning tumors to being malignant (15,41,42). Therefore, we also consider the effects of the biophysical parameters related to cytoskeletal force production, the propulsive force  $f_p$  and the dipole stress  $f_d$ . To analyze our results, we use the same 50 h simulations as previously described, with an initially circular domain of biophysically altered cells surrounded by a cell population defined by our baseline

parameters (Table 1). We use random initial conditions for the cell polarizations and run 20 simulations for each parameter set. To use our results to make predictions about what is required for evasion, we compute the average velocity in the altered cell region and we also compute the evasion probability, which we define to be the percentage of simulations that produce a mass of cells that migrate outside the initial circular region.

### Mutations that alter cell-ECM adhesion

The integrins are the primary family of proteins that are used to adhere cells to the ECM, and alterations in the expression levels of integrins have been identified in numerous cancers (4). Some integrins, such as  $\alpha_6\beta_4$  and  $\alpha_v\beta_3$ , are increased during tumorigenesis; however, other integrins, such as  $\alpha_5\beta_1$ , are lost in metastatic cells (4). The role of substrate adhesion on single-cell migration is bimodal: when adhesion is low, increases in the adhesion produce increases in cell speed, whereas at high adhesion, increasing the substrate adhesion slows cells down (40). This result suggests that propulsive force depends on substrate adhesion and therefore on integrin expression levels. Here we examine how substrate adhesion affects evasion at fixed propulsive force. We find that reducing substrate adhesion increases cell speed and evasion probability in

our tumor simulations (Fig. 4 a), which is a consequence of the fact that reducing the substrate adhesion at fixed propulsive force is effectively like increasing the propulsive force and dipole stress at fixed adhesion. These results are consistent with the finding that some integrins, such as  $\alpha_2\beta_1$ , can act as a metastasis suppressor in mouse models and human cancer. For example, it has been shown that loss of  $\alpha_2\beta_1$  leads to an increase in cell speed and an increase in metastases (Fig. 4 a) (43).

### The role of cell-cell adhesion in the transition to metastasis

As previously mentioned, a number of metastatic cancers, such as breast, prostate, and brain cancers, show a reduction in cadherin expression (44), which is presumed to cause a reduction in cell-cell adhesion. In breast cancer, downregulation of E-cadherin has been shown to be required for the initiation of metastatic outgrowth (45). In our model, cell-cell adhesion strength is dictated by the cell-cell viscosity  $\eta$ , which controls how easily cells can slide with respect to each other. We simulated our tumor model over a range from 1.25 to 20 dynes h/cm. We found that the migratory speed and evasion probability show bimodal behavior. For  $\eta < 2.5$  dynes h/cm, increasing  $\eta$  leads to an increase in both speed and metastatic probability; however, above this

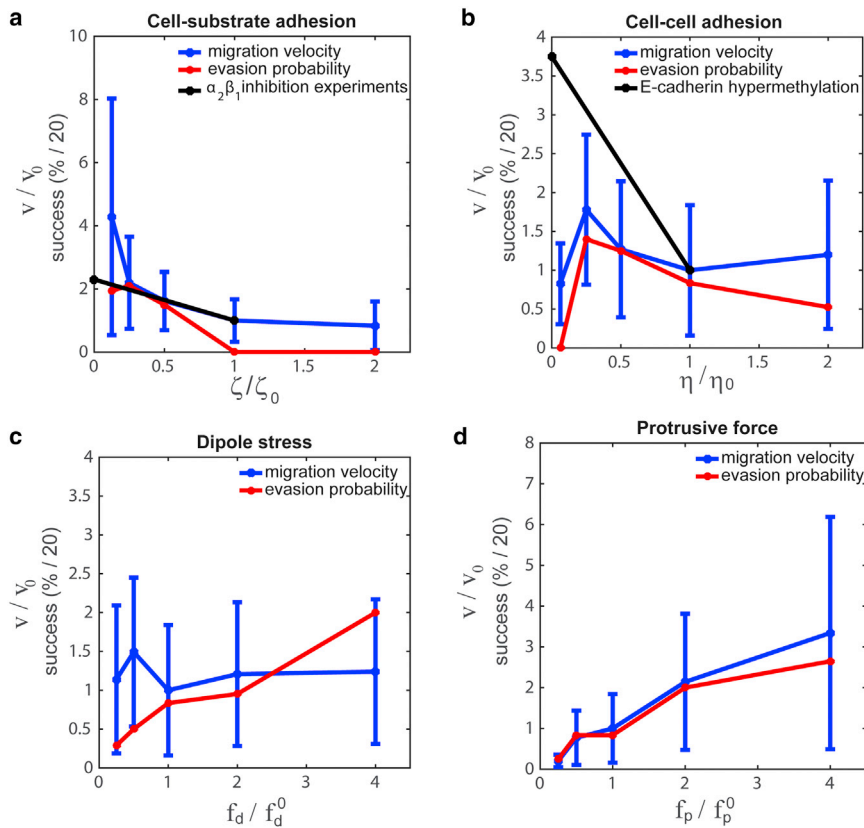

FIGURE 4 How migration speed and evasion probability depend on cellular biophysics. (a) The migration velocity and evasion probability versus cell-ECM adhesion is shown. We find that decreasing the cell-ECM adhesion ( $\zeta$ ) leads to an increase in migration speed (blue line) and evasion probability (red line). This result agrees with findings that primary tumor cells lacking  $\alpha_2\beta_1$  integrin migrate at faster speeds than wild-type cells (black line is normalized data from (43)). The evasion probability is defined as the percent of simulations where the mutated cells escape the initial circular zone within 50 h. (b) Migration velocity (blue) and evasion probability (red) shows a maximum as a function of cell-cell adhesion strength  $\eta$ . The increase in migration speed as a function of adhesion at low values of  $\eta$ , is consistent with experiments using promotor methylation of E-cadherin (black line shows data from (47)). (c) The tumor model predicts that migration velocity (blue) is roughly independent of the dipole stress, but that increases in dipole stress increase the evasion probability (red). (d) Migration velocity (blue) and evasion probability increase with the protrusive force. To see this figure in color, go online.

value of  $\eta$  the speed and evasion probability decrease (Fig. 4 b). In vitro migration assays have shown that inactivation of E-cadherin via promotor methylation (which is the type of inactivation involved in EMT (46)) leads to an increase in collective migration speed (47), which is consistent with our model when  $\eta > 2.5$  dynes h/cm (Fig. 4 b).

### The role of active force production in the transition to metastasis

Many metastatic cancers show altered expression of Rho GTPases and other proteins that are involved in cytoskeletal dynamics. For example, ROCK plays an essential part in tumor cell invasion, possibly because of its activation of myosin (48,49), the oncogene Ras downregulates Rac and leads to increased EMT activity (50), and, in connective tissue, tumor invasiveness is associated with increased contractile force generation (51). The actin cytoskeleton is the primary force-producing component that drives cell migration. In our model, the two parameters that control the active force production inside the cell are the contractile dipole stress  $f_d$  and the propulsive force  $f_p$ . Both of these parameters can be measured using single-cell assays. The dipole stress magnitude can be measured using traction-force microscopy (52), and the propulsive force is proportional to the average crawling speed. We examine the effect of each of these on migration speed and evasion probability in our tumor model. We find that although the dipole stress is not predicted to alter migration speed, that an increase in dipole stress by a factor of 10 increases the evasion probability from 5% to 40% (Fig. 4 c). On the other hand, increasing the propulsive force by a factor of 10 increase both migration speed and evasion probability by approximately the same factor (Fig. 4 d). It should be noted that the dipole stress also depends on cell shape. Therefore, changes in cell shape can alter the dipole-stress even if actomyosin contraction remains fairly constant.

### Toward a more realistic tumor model

The preceding “tumor” model was highly simplified to define a system that could presumably be tested with in vitro experiments. To probe how our model handles a more realistic tumor, we consider a 2D solid tumor that is surrounded by ECM. Because the tumor mass is primarily cells, there is reduced ECM, and, therefore, the cell-ECM drag coefficient is low ( $\zeta = 10^4$  dynes h/cm<sup>3</sup>). Because the tumor is surrounded by ECM, outside the initial tumor region, the cell-substrate adhesion is substantially higher ( $\zeta = 10^5$  dynes h/cm<sup>3</sup>). We consider a tumor of 400  $\mu\text{m}$  diameter and define a cortex region that is initially 50  $\mu\text{m}$  in width (denoted by the red line in Fig. 5). If the cells in the cortex are identical to the cells in the core, then motion of the cells inside the tumor is slow and the tumor does not change much within a 48 h period (Fig. 5 a); however, we

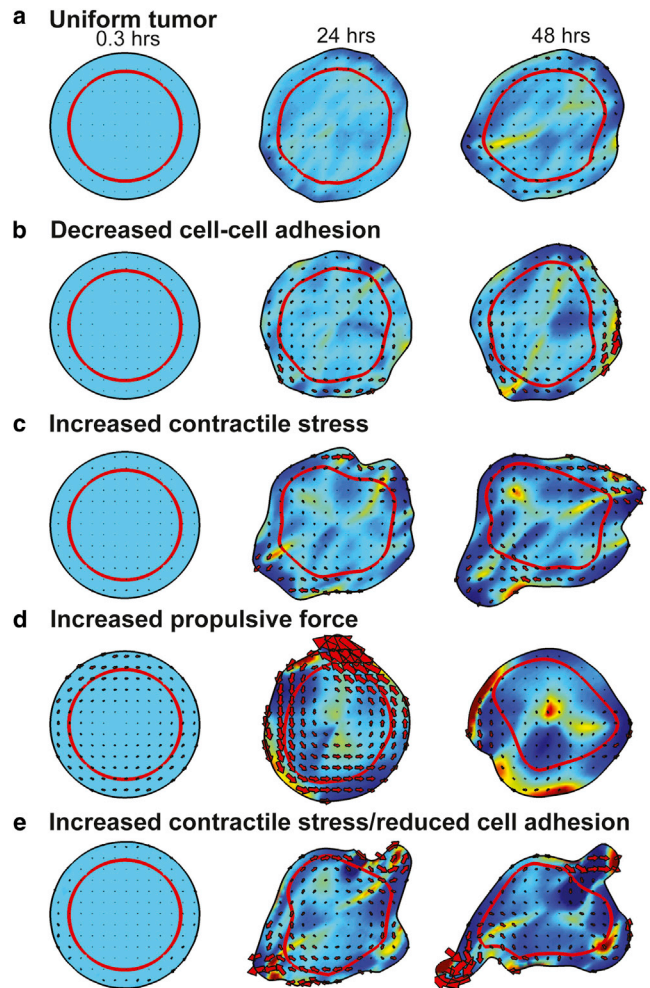

FIGURE 5 How biophysical alterations affect solid tumor dynamics. We simulated a 2D solid tumor model by considering an initially circular tumor surrounded by ECM. A region of cells near the periphery (red line) are biophysically altered. (a) When the cells at the periphery are unaltered, the tumor only deforms slightly within a 48 h period (Movie S3). (b) Lowering cell-cell adhesion ( $\eta = 2$  dynes h/cm) to mimic a reduction in cadherin leads to larger flows in the cortical region. Although the tumor border roughens some, there are still no large-scale motions (Movie S4). (c) Increasing contractile stress ( $f_d = 2.5$  dynes/cm) in the cortex leads to stretching of the cortex and a budding region that pulls away from the primary tumor (Movie S5). (d) Increasing the propulsive force ( $f_p = 1000$  dynes/cm<sup>2</sup>) in the cortex produced an initially large-scale rotation of the tumor that died down over time. In addition, much larger variations were observed in cell density (colormap) when larger propulsive forces were in the cortex (Movie S6). The red arrows show the local velocities within the tumor. (e) Increasing the contractile stress ( $f_d = 2.5$  dynes/cm) while simultaneously decreasing cell-cell adhesion ( $\eta = 2$  dynes h/cm) in the cortex produces thin protrusions off the tumor that begin to pinch off at around 48 h (Movie S7). The red arrows show the local velocities within the tumor. Except where otherwise noted, the parameters that are used are  $\eta = 10$  dynes h/cm,  $f_d = 0.5$  dynes/cm,  $f_p = 100$  dynes/cm<sup>2</sup>,  $\zeta = 10^4$  dynes h/cm<sup>3</sup> (inside the initial tumor region),  $10^5$  dynes h/cm<sup>3</sup> (outside the initial tumor region), and  $\sigma_0 = 10^{-8}$  dynes/cm,  $c_0 = 1$ . To see this figure in color, go online.



did notice a small rotation of the tumor with speeds near the periphery of 2–3  $\mu\text{m}/\text{h}$ . We then investigated how altering the biophysics of the cells in the cortex affected the tumor dynamics. We began by decreasing the cell-cell adhesion to mimic downregulation of cadherin (Fig. 5 *b*). In these simulations, we saw increased rotation (with speeds of  $\sim 10 \mu\text{m}/\text{h}$ ) in the cortex and a roughening of the tumor boundary. However, over the 48 h simulation, the tumor shape did not change substantially. Increasing the contractile stress in the cortex produced qualitatively different behavior. For one, the tumor no longer showed uniform rotation. In addition, the tumor began to stretch and one region began to bud and pull away from the primary tumor (Fig. 5 *c*). We then examined how changing the propulsive force affected tumor dynamics. In these simulations, a large rotation of the tumor mass was seen during the first 24 h (Fig. 5 *d*). This rotation eventually died away, but we observed large deviations in cellular density throughout the tumor. Based on these findings, we hypothesized that increasing the contractile stress while lowering the cell-cell adhesion might produce more motile protrusions. Indeed, we found that increasing the contractile stress while decreasing the cell-cell adhesion lead to long finger-like projections that began to pinch off at around 48 h (Fig. 5 *e*).

## DISCUSSION

The large heterogeneity in metastatic cancer cells at the genomic and proteomic levels suggests that the metastatic potential of a cell is dictated by a large number of functionally redundant mechanisms. What criteria then determine whether a cell or group of cells are malignant? Because metastasis involves cellular migration, we propose that there are a countable number of biophysical parameters that regulate metastatic potential. To test this hypothesis, we began by validating an existing biophysical model for collective migration in epithelial tissues (17,18). We showed that this model can accurately reproduce migration rates in wound healing assays where cancer-relevant cell lines were perturbed to alter cell-cell adhesion or actomyosin contraction.

We then used this model to study a simplified picture of the transition of a tumor from benign to metastatic by treating the main mass of a primary tumor as being comprised of a biophysically uniform population of cells. We showed that subregions of this uniform population remain fairly stationary. However, when a small region within the population is “mutated” by altering the biophysical parameters, it is possible to get spontaneous migration of the mutated population of cells, which therefore predicts changes that may be involved in the early stages of metastasis. One such alteration was the simultaneous increase of cell-ECM adhesion concomitant with decrease of cell-cell viscosity, which mimics the upregulation of integrin along with downregulation of cadherin that is observed in a number of metastases

(3). In addition, we showed the effects that alterations to cell-substrate adhesion, cell-cell adhesion, contractile forces, and propulsive forces have on the cell speed and the evasion probability for tumor cells. Specifically, we showed that cell migration speed was roughly proportional to propulsive force, inversely proportional to cell-ECM adhesion, and not strongly dependent on dipole stress or cell-cell adhesion, whereas the evasion probability (the likelihood that a region of mutated cells will migrate a substantial distance ( $\sim 100 \mu\text{m}$ ) in a short amount of time ( $\sim 50 \text{h}$ )) increased with dipole stress and propulsive force, decreased with cell-ECM adhesion, and depended in a biphasic manner with cell-cell adhesion.

To investigate a more realistic tumor model, we then considered a solid tumor where cells in a cortical region are biophysically altered. In many cases, we found that there is a tendency for the tumor to rotate. Only when we altered the contractile stress did we disrupt net rotation and also got a region of the cortex to bud off from the primary tumor mass (Fig. 5 *c*). Experiments looking at epithelial acini, which are a spherical arrangement of cells that are considered to be precursors to duct formation, observe rotation of the acinar structure; however, cancer cells under similar conditions do not rotate (53,54). Our results seem to suggest that our model may be capturing aspects of this behavior, but a more detailed analysis will need to be done to fully examine this question.

Whereas much of the work in the transition to metastasis has focused on the genetic mutations and altered expression that occurs during this process, we propose a complementary approach to investigate the biophysical alterations that produce metastasis. We use a simplified model that considers the tumor to be a 2D epithelial tissue where the ECM and cells are treated as uniform continua. Although actual tumors are more complicated three-dimensional objects with discrete cells and an ECM that is actively remodeled during the progression of cancer, the setup of our model is tractable for experimental testing. For example, the predictions of this model could be tested using single-cell measurements to probe the biophysical parameters of single cell, such as crawling speed and traction force. If two populations of biophysically different cell types are co-cultured in a 2D confluent monolayer, it would allow for the measurement of the migration of subpopulations of cells that could be compared with our predictions.

## SUPPORTING MATERIAL

Supporting Materials and Methods and seven movies are available at [http://www.biophysj.org/biophysj/supplemental/S0006-3495\(16\)30393-9](http://www.biophysj.org/biophysj/supplemental/S0006-3495(16)30393-9).

## AUTHOR CONTRIBUTIONS

C.W.W. and P.L. designed and performed the research, analyzed the data, and wrote the article.

## ACKNOWLEDGMENTS

This research was partially supported by the NSF (DMS 0920279) and NCI (U54CA143868). P.L. was also partially supported by NIH (P50GM094503).

## REFERENCES

- Ruddon, R. W. 2007. *Cancer Biology*. Oxford University Press, New York.
- Berx, G., A. M. Cleton-Jansen, ..., F. van Roy. 1995. E-cadherin is a tumour/invasion suppressor gene mutated in human lobular breast cancers. *EMBO J.* 14:6107–6115.
- Canel, M., A. Serrels, ..., V. G. Brunton. 2013. E-cadherin-integrin crosstalk in cancer invasion and metastasis. *J. Cell Sci.* 126:393–401.
- Hood, J. D., and D. A. Cheresh. 2002. Role of integrins in cell invasion and migration. *Nat. Rev. Cancer.* 2:91–100.
- Gupta, G. P., and J. Massagué. 2006. Cancer metastasis: building a framework. *Cell.* 127:679–695.
- Hanahan, D., and R. A. Weinberg. 2011. Hallmarks of cancer: the next generation. *Cell.* 144:646–674.
- Smith, S. C., and D. Theodorescu. 2009. Learning therapeutic lessons from metastasis suppressor proteins. *Nat. Rev. Cancer.* 9:253–264.
- Gerlinger, M., A. J. Rowan, ..., C. Swanton. 2012. Intratumor heterogeneity and branched evolution revealed by multiregion sequencing. *N. Engl. J. Med.* 366:883–892.
- Navin, N., J. Kendall, ..., M. Wigler. 2011. Tumour evolution inferred by single-cell sequencing. *Nature.* 472:90–94.
- Suresh, S. 2007. Biomechanics and biophysics of cancer cells. *Acta Biomater.* 3:413–438.
- Kumar, S., and V. M. Weaver. 2009. Mechanics, malignancy, and metastasis: the force journey of a tumor cell. *Cancer Metastasis Rev.* 28:113–127.
- Remmerbach, T. W., F. Wottawah, ..., J. Guck. 2009. Oral cancer diagnosis by mechanical phenotyping. *Cancer Res.* 69:1728–1732.
- Fritsch, A., M. Höckel, ..., J. A. Käls. 2010. Are biomechanical changes necessary for tumour progression? *Nat. Phys.* 6:730–732.
- Muller, P. A. J., and K. H. Vousden. 2013. p53 mutations in cancer. *Nat. Cell Biol.* 15:2–8.
- Vega, F. M., and A. J. Ridley. 2008. Rho GTPases in cancer cell biology. *FEBS Lett.* 582:2093–2101.
- Gheldof, A., and G. Berx. 2013. Cadherins and epithelial-to-mesenchymal transition. *Prog. Mol. Biol. Transl. Sci.* 116:317–336.
- Lee, P., and C. W. Wolgemuth. 2011. Crawling cells can close wounds without purse strings or signaling. *PLoS Comput. Biol.* 7:e1002007.
- Lee, P., and C. Wolgemuth. 2011. Advent of complex flows in epithelial tissues. *Phys. Rev. E Stat. Nonlin. Soft Matter Phys.* 83:061920.
- Wolgemuth, C. W., and M. Zajac. 2010. The moving boundary node method: a level set-based, finite volume algorithm with applications to cell motility. *J. Comput. Phys.* 229:7287–7308.
- Fenteany, G., P. A. Janmey, and T. P. Stossel. 2000. Signaling pathways and cell mechanics involved in wound closure by epithelial cell sheets. *Curr. Biol.* 10:831–838.
- Wu, P.-H., A. Giri, ..., D. Wirtz. 2014. Three-dimensional cell migration does not follow a random walk. *Proc. Natl. Acad. Sci. USA.* 111:3949–3954.
- Lauffenburger, D. A., and A. F. Horwitz. 1996. Cell migration: a physically integrated molecular process. *Cell.* 84:359–369.
- du Roure, O., A. Saez, ..., B. Ladoux. 2005. Force mapping in epithelial cell migration. *Proc. Natl. Acad. Sci. USA.* 102:2390–2395.
- Chen, C. P., S. Posy, ..., B. H. Honig. 2005. Specificity of cell-cell adhesion by classical cadherins: critical role for low-affinity dimerization through beta-strand swapping. *Proc. Natl. Acad. Sci. USA.* 102:8531–8536.
- Lambert, M., O. Thoumine, ..., R. M. Mège. 2007. Nucleation and growth of cadherin adhesions. *Exp. Cell Res.* 313:4025–4040.
- Petitjean, L., M. Reffay, ..., P. Silberzan. 2010. Velocity fields in a collectively migrating epithelium. *Biophys. J.* 98:1790–1800.
- Poujade, M., E. Grasland-Mongrain, ..., P. Silberzan. 2007. Collective migration of an epithelial monolayer in response to a model wound. *Proc. Natl. Acad. Sci. USA.* 104:15988–15993.
- Palsson, E., and H. G. Othmer. 2000. A model for individual and collective cell movement in *Dictyostelium discoideum*. *Proc. Natl. Acad. Sci. USA.* 97:10448–10453.
- Basan, M., J. Elgeti, ..., H. Levine. 2013. Alignment of cellular motility forces with tissue flow as a mechanism for efficient wound healing. *Proc. Natl. Acad. Sci. USA.* 110:2452–2459.
- Li, B., and S. X. Sun. 2014. Coherent motions in confluent cell monolayer sheets. *Biophys. J.* 107:1532–1541.
- Maeda, M., K. R. Johnson, and M. J. Wheelock. 2005. Cadherin switching: essential for behavioral but not morphological changes during an epithelium-to-mesenchyme transition. *J. Cell Sci.* 118:873–887.
- Samatov, T. R., A. G. Tonevitsky, and U. Schumacher. 2013. Epithelial-mesenchymal transition: focus on metastatic cascade, alternative splicing, non-coding RNAs and modulating compounds. *Mol. Cancer.* 12:107.
- Liu, Z., L. A. van Grunsven, ..., H. Reynaert. 2010. Blebbistatin inhibits contraction and accelerates migration in mouse hepatic stellate cells. *Br. J. Pharmacol.* 159:304–315.
- Ng, M. R., A. Besser, ..., J. S. Brugge. 2012. Substrate stiffness regulates cadherin-dependent collective migration through myosin-II contractility. *J. Cell Biol.* 199:545–563.
- Matsubayashi, Y., W. Razzell, and P. Martin. 2011. ‘White wave’ analysis of epithelial scratch wound healing reveals how cells mobilise back from the leading edge in a myosin-II-dependent fashion. *J. Cell Sci.* 124:1017–1021.
- Mouneimne, G., S. D. Hansen, ..., J. S. Brugge. 2012. Differential remodeling of actin cytoskeleton architecture by profilin isoforms leads to distinct effects on cell migration and invasion. *Cancer Cell.* 22:615–630.
- Friedl, P., and D. Gilmour. 2009. Collective cell migration in morphogenesis, regeneration and cancer. *Nat. Rev. Mol. Cell Biol.* 10:445–457.
- Paluch, E. K., and E. Raz. 2013. The role and regulation of blebs in cell migration. *Curr. Opin. Cell Biol.* 25:582–590.
- Panková, K., D. Rösel, ..., J. Brábek. 2010. The molecular mechanisms of transition between mesenchymal and amoeboid invasiveness in tumor cells. *Cell. Mol. Life Sci.* 67:63–71.
- Palecek, S. P., J. C. Loftus, ..., A. F. Horwitz. 1997. Integrin-ligand binding properties govern cell migration speed through cell-substratum adhesiveness. *Nature.* 385:537–540.
- Kitzing, T. M., Y. Wang, ..., R. Grosse. 2010. Formin-like 2 drives amoeboid invasive cell motility downstream of RhoC. *Oncogene.* 29:2441–2448.
- Horiuchi, A., T. Imai, ..., I. Konishi. 2003. Up-regulation of small GTPases, RhoA and RhoC, is associated with tumor progression in ovarian carcinoma. *Lab. Invest.* 83:861–870.
- Ramirez, N. E., Z. Zhang, ..., M. M. Zutter. 2011. The  $\alpha_2\beta_1$  integrin is a metastasis suppressor in mouse models and human cancer. *J. Clin. Invest.* 121:226–237.
- Yang, J., S. A. Mani, ..., R. A. Weinberg. 2004. Twist, a master regulator of morphogenesis, plays an essential role in tumor metastasis. *Cell.* 117:927–939.
- Wendt, M. K., M. A. Taylor, ..., W. P. Schiemann. 2011. Down-regulation of epithelial cadherin is required to initiate metastatic outgrowth of breast cancer. *Mol. Biol. Cell.* 22:2423–2435.
- Lombaerts, M., T. van Wezel, ..., A. M. Cleton-Jansen. 2006. E-cadherin transcriptional downregulation by promoter methylation but not

- mutation is related to epithelial-to-mesenchymal transition in breast cancer cell lines. *Br. J. Cancer*. 94:661–671.
47. van Horssen, R., A. Hollestelle, ..., T. L. Ten Hagen. 2012. E-cadherin promotor methylation and mutation are inversely related to motility capacity of breast cancer cells. *Breast Cancer Res. Treat.* 136:365–377.
  48. Itoh, K., K. Yoshioka, ..., S. Narumiya. 1999. An essential part for Rho-associated kinase in the transcellular invasion of tumor cells. *Nat. Med.* 5:221–225.
  49. Wilkinson, S., H. F. Paterson, and C. J. Marshall. 2005. Cdc42-MRCK and Rho-ROCK signalling cooperate in myosin phosphorylation and cell invasion. *Nat. Cell Biol.* 7:255–261.
  50. Zondag, G. C., E. E. Evers, ..., J. G. Collard. 2000. Oncogenic Ras downregulates Rac activity, which leads to increased Rho activity and epithelial-mesenchymal transition. *J. Cell Biol.* 149:775–782.
  51. Mierke, C. T., D. Rösel, ..., J. Brábek. 2008. Contractile forces in tumor cell migration. *Eur. J. Cell Biol.* 87:669–676.
  52. Style, R. W., R. Boltanskiy, ..., E. R. Dufresne. 2014. Traction force microscopy in physics and biology. *Soft Matter*. 10:4047–4055.
  53. Wang, H., S. Lacoche, ..., S. K. Muthuswamy. 2013. Rotational motion during three-dimensional morphogenesis of mammary epithelial acini relates to laminin matrix assembly. *Proc. Natl. Acad. Sci. USA*. 110:163–168.
  54. Tanner, K., H. Mori, ..., M. J. Bissell. 2012. Coherent angular motion in the establishment of multicellular architecture of glandular tissues. *Proc. Natl. Acad. Sci. USA*. 109:1973–1978.
  55. Boca, M., L. D’Amato, ..., A. Boletta. 2007. Polycystin-1 induces cell migration by regulating phosphatidylinositol 3-kinase-dependent cytoskeletal rearrangements and GSK3beta-dependent cell-cell mechanical adhesion. *Mol. Biol. Cell*. 18:4050–4061.
  56. Kole, T. P., Y. Tseng, ..., D. Wirtz. 2005. Intracellular mechanics of migrating fibroblasts. *Mol. Biol. Cell*. 16:328–338.

**Biophysical Journal, Volume 111**

**Supplemental Information**

**Physical Mechanisms of Cancer in the Transition to Metastasis**

**Pilhwa Lee and Charles W. Wolgemuth**

## Supplemental Text

### Text S1. Mathematical model for epithelial dynamics

**Force balance in an epithelial layer.** Our model for the dynamics of epithelial tissues is based off the model we developed previously (14,15). This model considers a continuous epithelium made up of motile cells adhered to each other and to the extracellular matrix (ECM). We begin by considering the physics of a single motile cell and then, by averaging over the cell-cell adhesion forces, we construct a continuum level model for the epithelial tissue.

In wound healing assays, the cells are constrained to move along the surface of the substrate. Therefore, we can consider a two-dimensional model for the cellular motions. Intracellular cytoskeletal flow interact with the substrate through adhesion proteins, such as integrins. It is reasonable to treat the force per area on the cell that arises from this interaction as being a resistive drag proportional to the cytoskeletal velocity (14). In 2D, stresses inside the cell, defined by the stress tensor  $\sigma_{in}$ , lead to cytoskeletal actin flows  $\mathbf{V}$ . Since the resistive forces within a cell are large compared to the inertia of the cell, the sum of all the forces acting at a point within the cell sum to approximately zero. It can be shown (14) that the correct 2D approximation for force balance on the cell is then given by

$$\nabla \cdot \sigma_{in} = \zeta \mathbf{V} \quad (1)$$

where  $\zeta$  is the drag coefficient.

The cytoskeletal velocity is spatially-dependent, with most crawling cells having a retrograde flow of actin at the leading edge and flow at the rear of the cell approximately equal to the velocity of the cell. Therefore, we decompose the cytoskeletal velocity using the net cell velocity  $\mathbf{V}_0$  and a deviation velocity  $\delta\mathbf{v}$ ;  $\mathbf{V} = \mathbf{V}_0 + \delta\mathbf{v}$ . We assume that the velocity of the cell is in the direction of the polarization of the cell,  $\mathbf{V}_0 = V_0\mathbf{d}$ . The thrust force that the cell exerts on the substrate is  $\mathbf{F} = \zeta V_0 A \mathbf{d} = A f_p \mathbf{d}$ , where  $A$  is the area of the cell, and  $f_p$  is the propulsive force per area.

From our definitions, the deviation velocity  $\delta\mathbf{v}$  is zero at the rear of the cell and negative at the front of the cell. The internal cellular stress must generate this flow. In general, we can write the internal stress as a function of position as

$$\sigma_{\text{in}} = f(x, y)\mathbf{I} + g(x, y)\mathbf{d}\mathbf{d} + h(x, y)\mathbf{d}\mathbf{e}, \quad (2)$$

where  $\mathbf{I}$  is the identity matrix, and  $\mathbf{e}$  is the unit vector perpendicular to  $\mathbf{d}$ . For highly polarized cells, we choose set  $f(x, y)$  and  $h(x, y)$  equal to zero. In addition, in the absence of other external forces applied to the cell, the two-dimensional internal stress must equal zero at the edges of the cell. These conditions imply that the average internal stress is positive and aligned along the dyadic  $\mathbf{d}\mathbf{d}$ . We define the average intracellular contractile stress as  $f_d$ , which then gives that  $\sigma_{\text{in}} = f_d\mathbf{d}\mathbf{d}$ . From our definitions, the deviation velocity is

$$\delta\mathbf{v} = \frac{1}{\zeta}\nabla \cdot \sigma_{\text{in}} - \frac{f_p}{\zeta}\mathbf{d}. \quad (3)$$

We can now use these results to write an equation for the force balance inside an epithelial cell monolayer. Treating the monolayer as a continuous medium, we define the stress  $\sigma_m$  in the monolayer. Averaging this stress over the height of the cell layer and assuming that the substrate produces a resistive drag against the cells, the equation for the monolayer is analogous to (Eq. 1):

$$\nabla \cdot \sigma_m = \zeta\mathbf{V}, \quad (4)$$

where  $\mathbf{v}$  is the local velocity of the actin flow inside the monolayer. Once again, we decompose this velocity into an average velocity of the cells centered at the location  $\mathbf{x}$ ,  $\mathbf{v}(\mathbf{x})$ , and the internal variations in the cytoskeletal velocities,  $\delta\mathbf{v}$ . If we assume that the intracellular cytoskeletal flows remain roughly the same, then we can re-write Eq. 4 as

$$\nabla \cdot \sigma_m = \zeta\mathbf{v} + \nabla \cdot (f_d\mathbf{d}\mathbf{d}) - f_p\mathbf{d} \quad (5)$$

A constitutive relation is required to define the monolayer stress. For this, we define two types of forces that act between the cells. First, we assume that the cells are elastic objects that have a preferred spread area. Motion of the cells can change the density that the cells

are packed in the monolayer. If we define the density as  $c$  and the preferred density as  $c_0$ , then we expect that there will be an isotropic pressure that is proportional to  $c - c_0$  that tries to maintain the preferred cell density. Second, there is a stress between cells,  $\sigma_c$  that arises from cell-cell adhesion, which is predominantly mediated by cadherin bonds. Since cadherin molecules turnover, the cells can slip with respect to each other. As we describe below, this dynamics can be approximated by the Maxwell model for viscoelastic fluids.

**Transition from elasticity to viscosity.** Cell-cell adhesion is mediated by cadherin molecules (19, 20). Fluorescent recovery after photobleaching (FRAP) experiments show that cadherin turnover in adhesions has a characteristic rate of around  $3.9 \text{ hr}^{-1}$  (20). Therefore, we expect that on timescales less than 15 minutes, that nearby cells remain well adhered, and that the cell monolayer will behave elastically for times less than this. However, for times longer than 15 minutes, the adhesions can break, and the cells can slip. Therefore, we expect viscous behavior on longer timescales. The simplest model that reflects this behavior is the Maxwell model for a viscoelastic fluid, which relates the stress in the material to the velocity. Therefore, to model cell-cell adhesion, we use the Maxwell model to describe the intercellular stress  $\sigma_m$ :

$$\begin{aligned} \tau \frac{\partial \sigma_m}{\partial t} + \sigma_m = & \eta(\nabla \mathbf{v} + (\nabla \mathbf{v})^T) + (\lambda - \eta)(\nabla \cdot \mathbf{v})\mathbf{I} - \sigma_0(c - c_0)\mathbf{I} \\ & - \beta \left( \frac{V_{\text{tumor}}^0 - V_{\text{tumor}}}{V_{\text{tumor}}^0} \right) \mathbf{I}_{\text{tumor}} \end{aligned} \quad (8)$$

In this model,  $\tau$  is the cadherin turnover timescale, and  $\eta$  is a cell-cell viscosity that depends on the average number of bound cadherin molecules and the strength of the cadherin bond. In addition, there is resistance to compression or extension that is defined by  $\lambda$ . The identity matrix is defined as  $\mathbf{I}$ . For our monolayer tumor model, we also add in an additional pressure to preserve the area of mutated region. The strength of this term is given by  $\beta$  and this term is only used within the tumor region.

Equations (6-9) are a closed set of equations that describe the dynamics of the epithelial tissues that we investigate. We non-dimensionalize these equations using the following parameters and state variables:

$$\tilde{b} = \frac{f_d}{\zeta V_0 L}, \quad \tilde{\eta} = \frac{\eta}{\zeta L^2}, \quad \tilde{\lambda} = \frac{\lambda}{\zeta L^2}, \quad \tilde{K} = \frac{K}{\zeta_r V_0 L}, \quad \tilde{\tau} = \frac{\tau V_0}{L}, \quad \tilde{f}_p = \frac{f_p}{\zeta V_0}, \quad \tilde{D} = \frac{D}{V_0 L} \quad (5)$$

$$\tilde{\sigma} = \frac{\sigma A}{\zeta V_0}, \quad \tilde{\mathbf{v}} = \frac{\mathbf{v}}{V_0}, \quad \tilde{c} = \frac{c}{c_0} \quad (9)$$

where  $L$  is the initial thickness of the strip in our wound healing simulations, or the circular diameter of the mutated region in our cancer metastasis simulations.

### Numerical method

Our numerical procedure for solving the wound healing assay simulations and cancer metastasis model follow the methodology that we have used previously and is described in detail in (14). In what follows, we describe the numerical procedure briefly for the cancer metastasis model and the wound healing simulations.

#### The procedure for the monolayer tumor simulations

The initial cell orientation is distributed randomly with a uniform distribution in orientation angle. To define the random cellular polarization at the initial time, we assume the initial orientation  $\theta \in [-\pi, \pi)$ . We choose our time step such that the maximum velocity times the time step size is less than the grid spacing.

The time-stepping algorithm for our simulations is composed of the following steps:

- (1) Time step the cell density dynamics (Eq. 6).
- (2) Time step the cellular orientation dynamics (Eq. 7).
- (3) Time step the cell-cell adhesion stress dynamics (Eq. 8).
- (4) Time step the border location.

For simplicity, we apply the following notations for the advection and curl operators  $A^n$  and  $\omega^n$  with the finite volume  $\Delta V^n$  at time step  $n$ :

$$A^n = \Delta V^n \mathbf{v}^n (\cdot \nabla)^n$$

$$\omega^n = \nabla^n \times \mathbf{v}^n$$



At the boundary between the benign tissue and the biophysically modified cells, the stress is continuous. To handle this, we compute the total stress  $\sigma_T = \sigma_c - f_d \mathbf{d}\mathbf{d}$  at the boundary rather than the cell-cell adhesion stress.

Time-stepping from  $t^n$  to  $t^{n+1}$  uses a Crank-Nicolson second order method, which is described in the sub-steps (A) and (B) below.

At the boundary of the computational domain, we use periodic boundary condition for the velocity, orientation, and stress variables.

**A. Intermediate time stepping:**  $(\mathbf{v}^n, \mathbf{d}^n, \tilde{\sigma}_T^n, \phi^n, \tilde{c}^n) \rightarrow (\mathbf{v}^{n+1/2}, \mathbf{d}^{n+1/2}, \tilde{\sigma}_T^{n+1/2}, \phi^{n+1/2}, \tilde{c}^{n+1/2})$

$$1A) \quad (\Delta V^{n+1/2} \mathbf{I} - \frac{\tilde{D}\Delta t}{2} \mathbf{L}^{n+1/2}) \tilde{c}^{n+1/2} = \Delta V^n \tilde{c}^n - A^n \tilde{c}^n \frac{\Delta t}{2}$$

$$1B) \quad (\frac{2\Delta V^{n+1/2}}{\Delta t} \mathbf{I} - \tilde{K} \mathbf{L}^{n+1/2}) \mathbf{d}^{n+1/2} = \frac{2\Delta V^n}{\Delta t} \mathbf{d}^n - A^n \mathbf{d}^n + \frac{1}{2} \omega^n \times \mathbf{d}^n \Delta V^n$$

$$1C) \quad (1 + \frac{2\tilde{\tau}}{\Delta t}) \Delta V^{n+1/2} \tilde{\sigma}_T^{n+1/2} = \frac{2\tilde{\tau}\Delta V^n}{\Delta t} \tilde{\sigma}_T^n + \frac{\tilde{\eta}_i}{2} (D^n \mathbf{v}^n + (D^n \mathbf{v}^n)^T) + (\tilde{\lambda} - \frac{\tilde{\eta}_i}{2}) D^n \cdot \mathbf{v}^n \\ + \frac{2\tilde{\tau}\tilde{b}_i}{\Delta t} \{ \Delta V^{n+1/2} (\mathbf{d}^{n+1/2} \mathbf{d}^{n+1/2}) - \Delta V^n (\mathbf{d}^n \mathbf{d}^n) \} + \tilde{b}_i \Delta V^n (\mathbf{d}^n \mathbf{d}^n) \\ - \beta (\frac{V_{\text{tumor}}^0 - V_{\text{tumor}}^n}{V_{\text{tumor}}^0}) \Delta V^n$$

$$1D) \quad \Delta V^{n+1/2} \mathbf{v}^{n+1/2} = D^{n+1/2} \cdot \tilde{\sigma}_T^{n+1/2} + \tilde{f}_p^i \mathbf{d}^{n+1/2} \Delta V^{n+1/2} - D^{n+1/2} (\tilde{\sigma}_0 (\tilde{c}^{n+1/2} - \tilde{c}_0))$$

**B. Full time stepping:**  $(\mathbf{v}^n, \mathbf{d}^n, \tilde{\sigma}_T^n, \phi^n, \mathbf{v}^{n+1/2}, \mathbf{d}^{n+1/2}, \tilde{\sigma}_T^{n+1/2}, \phi^{n+1/2}) \rightarrow (\mathbf{v}^{n+1}, \mathbf{d}^{n+1}, \tilde{\sigma}_T^{n+1}, \phi^{n+1})$

$$2A) \quad (\Delta V^{n+1} \mathbf{I} - \frac{\tilde{D}\Delta t}{2} \mathbf{L}^{n+1}) \tilde{\mathbf{c}}^{n+1} = \Delta V^n \tilde{\mathbf{c}}^n - A^{n+1/2} \tilde{\mathbf{c}}^{n+1/2} \Delta t + \frac{\tilde{D}\Delta t}{2} \mathbf{L}^n \tilde{\mathbf{c}}^n$$

$$2B) \quad \left( \frac{\Delta V^{n+1}}{\Delta t} \mathbf{I} - \frac{1}{2} \tilde{\mathbf{K}} \mathbf{L}^{n+1} \right) \mathbf{d}^{n+1} \\ = \frac{\Delta V^n}{\Delta t} \mathbf{d}^n - A^{n+1/2} \mathbf{d}^{n+1/2} + \frac{1}{2} \omega^{n+1/2} \times \mathbf{d}^{n+1/2} \Delta V^{n+1/2}$$

$$2C) \quad \left( \frac{1}{2} + \frac{\tilde{\tau}}{\Delta t} \right) \Delta V^{n+1} \tilde{\sigma}_T^{n+1} = \left( -\frac{1}{2} + \frac{\tilde{\tau}}{\Delta t} \right) \Delta V^n \tilde{\sigma}_T^n + \frac{\tilde{\eta}_i}{2} (D^{n+1/2} \mathbf{v}^{n+1/2} + (D^{n+1/2} \mathbf{v}^{n+1/2})^T) + (\tilde{\lambda} - \frac{\tilde{\eta}_i}{2}) D^{n+1/2} \cdot \mathbf{v}^{n+1/2} \\ + \frac{\tilde{b}_i}{\Delta t} \{ \Delta V^{n+1} (\mathbf{d}^{n+1} \mathbf{d}^{n+1}) - \Delta V^n (\mathbf{d}^n \mathbf{d}^n) \} + \frac{\tilde{b}_i}{2} \Delta V^{n+1/2} (\mathbf{d}^{n+1/2} \mathbf{d}^{n+1/2}) \\ - \frac{1}{2} \beta \left( \frac{V_{\text{tumor}}^0 - V_{\text{tumor}}^{n+1/2}}{V_{\text{tumor}}^0} \right) \Delta V^{n+1/2}$$

$$2D) \quad \Delta V^{n+1} \mathbf{v}^{n+1} = D^{n+1} \cdot \tilde{\sigma}_T^{n+1} + \tilde{f}_p^i \mathbf{d}^{n+1} \Delta V^{n+1} - D^{n+1} (\tilde{\sigma}_0 (\tilde{\mathbf{c}}^{n+1} - \tilde{\mathbf{c}}_0))$$

### The procedure for the wound healing assay

The algorithm is similar to the cancer metastasis simulations except that we also need to solve for the motion of the free boundary at the wound edge. At this boundary, we apply the left-handed and right-handed projections of the intermediate boundary stress tensor  $\tilde{\sigma}_c^*$  in the tangential direction  $\mathbf{t}$  and  $\mathbf{n}$  as follows:

$$\mathbf{n} \cdot \tilde{\sigma}^{n+1} \cdot \mathbf{n} = \mathbf{n} \cdot (\tilde{b} \mathbf{nn}) \cdot \mathbf{n}$$

$$\mathbf{t} \cdot \tilde{\sigma}^{n+1} \cdot \mathbf{n} = \mathbf{t} \cdot (\tilde{b} \mathbf{nn}) \cdot \mathbf{n}$$

$$\mathbf{t} \cdot \tilde{\sigma}^{n+1} \cdot \mathbf{t} = \mathbf{t} \cdot \tilde{\sigma}^* \cdot \mathbf{t}$$

After algebraic rearrangement,

$$P \tilde{\sigma}^{n+1} = \tilde{\sigma}^P$$

where

$$\tilde{\sigma}^P = \begin{pmatrix} \mathbf{t} \cdot \tilde{\sigma}^* \cdot \mathbf{t} \\ 0 \\ \tilde{b} \end{pmatrix}$$

and the projection matrix is constituted in the following:

$$P = \begin{pmatrix} n_y^2 & -2n_x n_y & n_x^2 \\ n_x^2 & 2n_x n_y & n_y^2 \\ n_x n_y & n_x^2 - n_y^2 & n_x n_y \end{pmatrix}$$

where  $n_x$  and  $n_y$  are the  $x$  and  $y$  components of the normal vector of the boundary. The normal vector is computed using the gradient of the level set function.

### The procedure for the circular tumor model

Our circular tumor model is defined with an initial condition that includes three regions, a core region, a cortex and an exterior region. The core and the cortex can have different values for the biophysical parameters. In addition, because the initial tumor region is considered to be primarily cell-filled, the cell-ECM drag coefficient ( $\zeta$ ) is low within the initial tumor region and higher outside it. In order to delineate these regions, we define two signed distance maps,  $\psi_1$  and  $\psi_2$ . The zero contour of the first distance map is used to identify the boundary of the tumor, and the zero contour of the second distance map defines the boundary between the core and the cortex. The initial condition for the tumor geometry is a circle of diameter of 400  $\mu\text{m}$  and the core is a circle with diameter 300  $\mu\text{m}$ .

Rather than solving the system of equations for our epithelial model (Eqs. 5-8) as written, we note that if we take the time derivative of Eq. 5, multiply it by  $\tau$ , and then add it back to Eq. 5, we can remove the monolayer stress from the equations of motion:

$$\begin{aligned} & \tau \frac{\partial}{\partial t} \left[ \nabla \cdot \sigma_m - \zeta \mathbf{v} - \nabla \cdot (f_d \mathbf{d}\mathbf{d}) + f_p \mathbf{d} \right] + \nabla \cdot \sigma_m - \zeta \mathbf{v} - \nabla \cdot (f_d \mathbf{d}\mathbf{d}) + f_p \mathbf{d} = 0 \\ \nabla \cdot \left( \tau \frac{\partial \sigma_m}{\partial t} + \sigma_m \right) - \zeta \left( \tau \frac{\partial \mathbf{v}}{\partial t} + \mathbf{v} \right) - \nabla \cdot \left( \tau \frac{\partial (f_d \mathbf{d}\mathbf{d})}{\partial t} + f_d \mathbf{d}\mathbf{d} \right) + f_p \left( \tau \frac{\partial \mathbf{d}}{\partial t} + \mathbf{d} \right) = 0 \end{aligned}$$

We then use Eq. 8 to rewrite the first term:

$$\begin{aligned} \zeta \left( \tau \frac{\partial \mathbf{v}}{\partial t} + \mathbf{v} \right) = & \nabla \cdot \left( \eta (\nabla \mathbf{v} + (\nabla \mathbf{v})^T) + (\lambda - \eta) (\nabla \cdot \mathbf{v}) \mathbf{I} \right) \\ & - \nabla \cdot \left( \tau \frac{\partial (f_d \mathbf{d}\mathbf{d})}{\partial t} + f_d \mathbf{d}\mathbf{d} \right) + f_p \left( \tau \frac{\partial \mathbf{d}}{\partial t} + \mathbf{d} \right) - \sigma_0 \nabla c \end{aligned} \quad (10)$$

We then solve Eqs. 6, 7, and 10 to determine the dynamics of the tumor. Because the core and the cortex can have different values for the parameters, the viscosity  $\eta$ , dipole stress  $f_d$  and propulsive force  $f_p$  are functions of space. We define the values of these parameters in the cortex as  $\eta_1, f_{d1}$  and  $f_{p1}$  and in the core as  $\eta_2, f_{d2}$  and  $f_{p2}$ . For numerical stability, we smooth out the variation in these biophysical parameters over approximately two nodes using a hyperbolic tangent function that depends on the second distance map:

$$\begin{aligned}\eta(\mathbf{x}) &= \eta_2 + \frac{1}{2}(\eta_1 - \eta_2) \left( 1 + \tanh\left(\frac{\psi_2}{\Delta x}\right) \right) \\ f_d(\mathbf{x}) &= \eta_2 + \frac{1}{2}(f_{d1} - f_{d2}) \left( 1 + \tanh\left(\frac{\psi_2}{\Delta x}\right) \right) \\ f_p(\mathbf{x}) &= \eta_2 + \frac{1}{2}(f_{p1} - f_{p2}) \left( 1 + \tanh\left(\frac{\psi_2}{\Delta x}\right) \right)\end{aligned}$$

where  $\Delta x$  is the grid spacing.

The boundary conditions at the edge of the tumor are that there is no flux for the cell density and the stress and orientation are given by

$$\begin{aligned}\sigma_m \cdot \mathbf{n} &= f_d \mathbf{d}(\mathbf{d} \cdot \mathbf{n}) \\ (\mathbf{n} \cdot \nabla) \mathbf{d} &= 0\end{aligned}$$

The stress boundary condition is used to define that the flux due to the divergence terms in Eq. 10 are zero at the tumor boundary.

We use the Boundary Node Method (47) to solve the equations on an  $80 \times 80$  grid of size  $600 \mu\text{m} \times 600 \mu\text{m}$ . The time-stepping algorithm we use is as follows:

1. Time step the density equation (Eq. 6) a half time-step using a backward Euler method.
2. Time step the orientation equation (Eq. 7) a half time-step using a backward Euler method.
3. Time step the velocity (Eq. 10) a half time-step using backward Euler. The time derivative terms of the orientation vector are computed numerically using the results of step 2.
4. Using the velocity at the half time computed in step 3, time step both distance maps a full time step using the level set method.

5. Using geometric information from both time  $t$  and time  $t + \Delta t$  (as is described in (49)) time step the Eqs. 6, 7 and 10 a full time step using a semi-implicit Crank-Nicolson routine.
